# Supplementary material for: Dynamically linking influenza virus infection kinetics, lung injury, inflammation, and disease severity
Source: eLife. 2021 Jul 20;10:e68864. doi: 10.7554/eLife.68864 (PMC8370774; doi:10.7554/eLife.68864)
Supplement: Source data 1. [file elife-68864-data1.xlsx]

## Sheet: Sheet1
Time	Naïve	1	2	3	4	5	6	7	8	9	10	11	12
Virus	0	4.18551	5.67816	6.00515	5.9364	5.97712	5.44716	5.19848	4.00515	0	0	0	0
	0	3.99136	5.47712	5.84488	5.82436	5.81012	5.0874	4.49136	0	0	0	0	0
	0	3.49136	5.44716	5.81012	5.83815	5.78016	5.2954	5.01851	2.94716	0	0	0	0
	0	3.29788	5.77233	6.24612	5.49136	5.9624	5.14412	5.51851	3.23882	0	0	0	0
	0	4.75515	5.9624	6.44716	5.78016	5.83244	5.99136	4.96982	0	0	0	0	0
	0	4.30151	5.49136	6.86448	5.70812	5.80282	4.9624	4.47712	0	0	0	0	0
	0	3.49136	5.7954	5.74951	6.03148	5.82436	5.2954	5.17215	3.26036	0	0	0	0
	0	4.00515	6.03148	5.83815	6.26036	6.1294	5.18551	4.83815	0	0	0	0	0
	0	3.49136	6.18551	5.78784	5.59921	5.97712	5.34488	5.47712	0	0	0	0	0
	0	4.50515	6.17215	6.03148	5.49136	5.34242	5.81012	5.01188	0	0	0	0	0
CD8	5.64585	5.50491	5.56919	5.94365	5.69241	5.66355	5.85292	6.25886	6.3246	6.19495	6.32138	6.12672	5.93601
	5.67054	5.66505	5.51893	6.05173	5.7012	5.9242	5.83003	6.15694	6.30267	6.29623	6.03171	5.94747	6.31927
	5.57582	5.68637	5.70933	5.71941	5.61656	5.88553	5.91491	6.13978	6.28087	6.20326	6.15265	5.82049	6.13542
	5.68078	5.64787	5.57261	5.89651	5.83459	5.6604	5.7391	6.12756	6.29689	6.28695	6.03722	6.29037	6.12158
	5.61576	5.6187	5.53967	5.6403	5.73699	5.67783	6.02618	6.07283	6.3287	6.13071	5.96879	6.29048	6.1358
	5.71285	5.78212	5.66552	5.85843	5.7489	6.009	5.70462	6.17857	6.3837	6.35661	6.3315	6.29492	5.81697
	5.63187	5.68377	5.65602	5.70305	5.83055	5.65042	5.9387	6.2522	6.36053	6.33334	6.12727	6.23849	6.23581
	5.47982	5.79337	5.80289	5.72239	5.94952	5.86895	6.08846	6.28199	6.20501	6.32295	6.01103	6.10762	6.30919
	5.6415	5.53114	5.85157	5.83226	5.85302	5.84081	6.01414	6.03963	6.19693	6.19282	6.24148	5.89416	6.0071
	5.72779	5.53853	5.56358	5.83629	5.8617	5.68015	6.08059	6.27071	6.40117	6.21641	6.17235	6.09248	6.23581
Lung CD8
	4.6	4.3	4.86	5.26	5.35	5.42	5.45	5.83	5.91	5.96	6.23	6.1	5.59
	4.92	4.24	4.79	5.11	5.17	4.86	5.46	5.9	6.26	6.11	6.08	6.02	6.2
	4.39	4.81	4.79	5.35	5.32	5.66	5.66	5.99	6.05	6.22	6.1	5.93	5.81
	4.57	4.58	5.17	5.07	5.17	5.63	5.61	6.25	6.15	6.1	5.95	5.93	5.95
	4.78	4.64	4.77	5.21	5.37	5.35	5.43	6	6.28	6.16	6.15	5.78	5.78
CD25-CD43+
	2.77	2.98	3.21	3.84	3.91	4.11	4.93	5.14	5.54	5.3	5.71	5.51	5.06
	3.16	3.07	3.18	3.82	3.8	3.72	4.94	5.22	5.89	5.51	5.45	5.42	5.78
	3.04	3.26	3.03	3.8	4.06	3.97	5.09	5.37	5.71	5.64	5.46	5.39	5.41
	2.4	3.34	3.32	3.58	4.16	4.29	4.96	5.64	5.85	5.53	5.15	5.37	5.58
	3.05	3.08	3.11	3.75	3.96	3.99	5.02	5.28	6.01	5.52	5.45	4.81	5.46
CD43-CD69+62L-CD127+CD103+
	0.30103	0.30103	2.1179	2.7403	2.86657	2.81416	3.04149	3.06565	2.93461	3.48731	3.95272	4.07452	4.11037
	1.85609	0.30103	2.31732	2.7532	2.69378	2.52774	3.05629	3.08254	3.59668	3.76378	3.87643	4.11037	4.54338
	0.30103	1.16106	1.89556	2.91039	2.84394	2.85935	3.08088	3.05175	3.15812	3.87643	3.74634	4.07088	4.38744
	0.30103	1.06875	2.55122	2.80323	3.03732	2.90338	3.15516	3.58991	3.04592	3.51731	3.65108	3.9743	4.4195
	1.93643	0.30103	2.44514	2.88901	2.78254	2.70146	2.83481	3.31533	3.21575	3.48516	3.93481	3.96133	4.23481
Histology
Active Lesion	0	0	0.0368494	0.111329	0.256963	0.235301	0.410618	0	0	0	0
	0	0	0.00735169	0.188711	0.215284	0.273874	0.323258	0.119918	0	0	0
	0	0	0.0110026	0.188376	0.246627	0.270192	0.234596	0.0981335	0	0	0
	0	0	0.0114362	0.191801	0.249547	0.293789	0.427054	0.0984485	0	0	0
	0	0	0.0434282	0.321248	0.356034	0.413972	0.354099	0	0	0	0
Inactive Lesion	0	0	0	0	0	0	0.136873	0.249158	0.369365	0.465391	0.324738
	0	0	0	0	0	0	0.107753	0.359755	0.575487	0.313635	0.423232
	0	0	0	0	0	0	0.0781987	0.294401	0.332975	0.338013	0.423951
	0	0	0	0	0	0	0.142351	0.295346	0.36058	0.479027	0.119823
	0	0	0	0	0	0	0.118033	0.346107	0.55323	0.534446	0.116126
Interstitial Inflammation
	0	0	1.5	2	2	3	3.5	3	3.5	4	3.5
	0	0	1.5	2.5	2	3	3	3	3.5	4	3.5
	0	0	1	2.5	3	3	3	3	3.5	3.5	3.5
	0	0	1	2.5	2.5	3	3.5	3	3.5	4	3.5
	0	0	1.5	2.5	2.5	3	3.5	3	3	3.5	3
Alveolar Inflammation
	0	0	1.5	2	3	3	4	3	3.5	4	3.5
	0	0	1.5	2.5	3	3	3.5	3.5	3.5	3.5	4
	0	0	1	3	3	3	3.5	3.6	4	4	3.5
	0	0	1	3	3	3	4	3.5	3.5	4	3.5
	0	0	1.5	3	3	3	4	3.5	3	4	3
Wt Loss	0	-0.88331	-1.6236	-2.59028	-3.159	-2.95055	-8.95745	-7.00686	-13.2268	-13.3714	-9.73596
STD	0	0.9608	1.7482	0.8116	1.756	3.6398	2.5366	5.5199	7.0509	7.5858	10.1185

## Sheet: Sheet2
Time	0	2	4	6	8	10
Virus	0	5.16	5.46	4.98	5.3	0
	0	5.16	5.39	4.97	4.8	0
	0	4.99	5.71	5.13	4.48	0
	0	5.19	5.16	4.98	4.13	0
CD8	4.09	4.44	4.49	4.83	5.09	5.34
	3.74	4.22	4.35	5.14	5.16	5.17
	3.43	4.03	4.29	4.57	4.98	5.22
	3.74	3.87	4.46	5.17	4.84	5.28
Wt Loss	0	-2.44466	-0.171444	-0.532086	-2.26256	-2.8328	-4.7	-6.16849	-6.01435	-4.06766	0.275948
STD	0	0.878411	1.53062	1.50149	1.00946	2.3086	3.318	4.29096	6.92972	5.95801	5.03023
